# Supplementary material for: Lipidomics and machine learning revealing dysregulation of specific triacylglycerol and phosphatidylglycerol as hub lipids associated with fetal growth in gestational diabetes mellitus
Source: PeerJ journal article supplement (doi:10.7717/peerj.20841), 2026-04-07
Supplement: Codebook_for_clinical_rawdata.pdf [file Codebook_for_clinical_rawdata.pdf]

## CodeBook for clinical rawdata

The table of variable name, data type, description and coding.

| Variable name           | Data type   | Description                                           | Coding                                                                                                                                                            |
|-------------------------|-------------|-------------------------------------------------------|-------------------------------------------------------------------------------------------------------------------------------------------------------------------|
| ID                      | \           | Designating identification number of the participants | \                                                                                                                                                                 |
| Group                   | Categorical | The groups of the different participants in the study | “GDM” =group of participants with GDM;<br>“NGDM” =group of participants without GDM                                                                               |
| Parity                  | Categorical | The number of born children of participants           | “0”=none of existing child;<br>“1”=1 born child;<br>“2”=2 born children;<br>“3”=3 born children;<br>“4”= 4 born children                                          |
| Neonatal_weight         | Numeric     | Neonatal related indicator                            | \                                                                                                                                                                 |
| Neonatal_length         | Numeric     | Neonatal related indicator                            | \                                                                                                                                                                 |
| Agpar_1min              | Numeric     | Neonatal related indicator (1-minute Apgar score)     | \                                                                                                                                                                 |
| Agpar_5min              | Numeric     | Neonatal related indicator (5-minute Apgar score)     | \                                                                                                                                                                 |
| Agpar_10min             | Numeric     | Neonatal related indicator (10-minute Apgar score)    | \                                                                                                                                                                 |
| Age                     | Numeric     | The age of participants                               | \                                                                                                                                                                 |
| Gestational_weight_gain | Numeric     | Pregnancy related indicator                           | \                                                                                                                                                                 |
| Educated_degree         | Categorical | The educated degree of participants                   | “higher_education”= bachelor degree and above;<br>“secondary_education”= secondary education;<br>“elementary_education_and_below”= elementary education and below |
| NT                      | Numeric     | Fetal related indicator (Nuchal translucency)         | \                                                                                                                                                                 |
| CRL                     | Numeric     | Fetal related indicator (Crown-                       | \                                                                                                                                                                 |

|       |         |                                            |   |
|-------|---------|--------------------------------------------|---|
|       |         | rump length)                               |   |
| ALT   | Numeric | Clinical related indicator of participants | \ |
| AST   | Numeric | Clinical related indicator of participants | \ |
| DRR   | Numeric | Clinical related indicator of participants | \ |
| TBIL  | Numeric | Clinical related indicator of participants | \ |
| DBIL  | Numeric | Clinical related indicator of participants | \ |
| IBIL  | Numeric | Clinical related indicator of participants | \ |
| TBA   | Numeric | Clinical related indicator of participants | \ |
| TP    | Numeric | Clinical related indicator of participants | \ |
| ALB   | Numeric | Clinical related indicator of participants | \ |
| GLO   | Numeric | Clinical related indicator of participants | \ |
| AGR   | Numeric | Clinical related indicator of participants | \ |
| ALP   | Numeric | Clinical related indicator of participants | \ |
| GGT   | Numeric | Clinical related indicator of participants | \ |
| CK    | Numeric | Clinical related indicator of participants | \ |
| CK_MB | Numeric | Clinical related indicator of participants | \ |
| LDH   | Numeric | Clinical related indicator of participants | \ |
| K     | Numeric | Clinical related indicator of participants | \ |
| Na    | Numeric | Clinical related indicator of participants | \ |
| Cl    | Numeric | Clinical related indicator of participants | \ |
| Ca    | Numeric | Clinical related indicator of participants | \ |
| Mg    | Numeric | Clinical related indicator of participants | \ |

|        |         |                                            |   |
|--------|---------|--------------------------------------------|---|
| P      | Numeric | Clinical related indicator of participants | \ |
| CO2    | Numeric | Clinical related indicator of participants | \ |
| GLU    | Numeric | Clinical related indicator of participants | \ |
| UREA   | Numeric | Clinical related indicator of participants | \ |
| CRE    | Numeric | Clinical related indicator of participants | \ |
| UA     | Numeric | Clinical related indicator of participants | \ |
| CHO    | Numeric | Clinical related indicator of participants | \ |
| TG     | Numeric | Clinical related indicator of participants | \ |
| HDLc   | Numeric | Clinical related indicator of participants | \ |
| LDLc   | Numeric | Clinical related indicator of participants | \ |
| apoA1  | Numeric | Clinical related indicator of participants | \ |
| apoB   | Numeric | Clinical related indicator of participants | \ |
| Sop    | Numeric | Clinical related indicator of participants | \ |
| CFR    | Numeric | Clinical related indicator of participants | \ |
| WBCC   | Numeric | Clinical related indicator of participants | \ |
| NE_per | Numeric | Clinical related indicator of participants | \ |
| LY_per | Numeric | Clinical related indicator of participants | \ |
| MO_per | Numeric | Clinical related indicator of participants | \ |
| EO_per | Numeric | Clinical related indicator of participants | \ |
| BA_per | Numeric | Clinical related indicator of participants | \ |
| NE     | Numeric | Clinical related indicator of participants | \ |
| LY     | Numeric | Clinical related indicator of participants | \ |

|          |         |                                            |   |
|----------|---------|--------------------------------------------|---|
| MO       | Numeric | Clinical related indicator of participants | \ |
| EO       | Numeric | Clinical related indicator of participants | \ |
| BA       | Numeric | Clinical related indicator of participants | \ |
| RBC      | Numeric | Clinical related indicator of participants | \ |
| HGB      | Numeric | Clinical related indicator of participants | \ |
| HCT      | Numeric | Clinical related indicator of participants | \ |
| MCV      | Numeric | Clinical related indicator of participants | \ |
| MCH      | Numeric | Clinical related indicator of participants | \ |
| MCHC     | Numeric | Clinical related indicator of participants | \ |
| RDW      | Numeric | Clinical related indicator of participants | \ |
| PLT      | Numeric | Clinical related indicator of participants | \ |
| PCT      | Numeric | Clinical related indicator of participants | \ |
| MPV      | Numeric | Clinical related indicator of participants | \ |
| PDW      | Numeric | Clinical related indicator of participants | \ |
| NRBC_per | Numeric | Clinical related indicator of participants | \ |
| NRBC     | Numeric | Clinical related indicator of participants | \ |
| FT3      | Numeric | Clinical related indicator of participants | \ |
| FT4      | Numeric | Clinical related indicator of participants | \ |
| TSH3     | Numeric | Clinical related indicator of participants | \ |
| 25OHD    | Numeric | Clinical related indicator of participants | \ |
| Fer      | Numeric | Clinical related indicator of participants | \ |
| PT       | Numeric | Clinical related indicator of participants | \ |

|        |             |                                                                                                         |                                                             |
|--------|-------------|---------------------------------------------------------------------------------------------------------|-------------------------------------------------------------|
| INR    | Numeric     | Clinical related indicator of participants                                                              | \                                                           |
| APTT   | Numeric     | Clinical related indicator of participants                                                              | \                                                           |
| TT     | Numeric     | Clinical related indicator of participants                                                              | \                                                           |
| FIB    | Numeric     | Clinical related indicator of participants                                                              | \                                                           |
| PLGF   | Numeric     | Clinical related indicator of participants                                                              | \                                                           |
| sFLT1  | Numeric     | Clinical related indicator of participants                                                              | \                                                           |
| BPD_ST | Numeric     | Indicators related fetal ultrasound examination (fetal biparietal diameter during second trimester)     | \                                                           |
| HC_ST  | Numeric     | Indicators related fetal ultrasound examination (fetal head circumference during second trimester)      | \                                                           |
| AC_ST  | Numeric     | Indicators related fetal ultrasound examination (fetal abdominal circumference during second trimester) | \                                                           |
| FL_ST  | Numeric     | Indicators related fetal ultrasound examination (fetal femur length during second trimester)            | \                                                           |
| MVP_ST | Numeric     | Indicators related fetal ultrasound examination (fetal maximum vertical pocket during second trimester) | \                                                           |
| AFI_ST | Numeric     | Indicators related fetal ultrasound examination (fetal amniotic fluid index during second trimester)    | \                                                           |
| PT_ST  | Numeric     | Indicators related fetal ultrasound examination (fetal placental thickness during second trimester)     | \                                                           |
| PM_ST  | Categorical | Indicators related fetal ultrasound examination (fetal placental maturity during second trimester)      | “0”=Grade 0;<br>“1”=Grade 1;<br>“2”=Grade 2;<br>“3”=Grade 3 |
| BPD_TT | Numeric     | Indicators related fetal ultrasound examination (fetal biparietal diameter during third trimester)      | \                                                           |
| HC_TT  | Numeric     | Indicators related fetal ultrasound                                                                     | \                                                           |

|           |             |                                                                                                        |                                                             |
|-----------|-------------|--------------------------------------------------------------------------------------------------------|-------------------------------------------------------------|
|           |             | examination (fetal head circumference during third trimester)                                          |                                                             |
| AC_TT     | Numeric     | Indicators related fetal ultrasound examination (fetal abdominal circumference during third trimester) | \                                                           |
| FL_TT     | Numeric     | Indicators related fetal ultrasound examination (fetal femur length during third trimester)            | \                                                           |
| MVP_TT    | Numeric     | Indicators related fetal ultrasound examination (fetal maximum vertical pocket during third trimester) | \                                                           |
| AFI_TT    | Numeric     | Indicators related fetal ultrasound examination (fetal amniotic fluid index during third trimester)    | \                                                           |
| PT_TT     | Numeric     | Indicators related fetal ultrasound examination (fetal placental thickness during third trimester)     | \                                                           |
| PM_TT     | Categorical | Indicators related fetal ultrasound examination (fetal placental maturity during third trimester)      | “0”=Grade 0;<br>“1”=Grade 1;<br>“2”=Grade 2;<br>“3”=Grade 3 |
| PSQIscore | Numeric     | Participants’ score of Pittsburgh sleep quality index                                                  | \                                                           |
| EPDSscore | Numeric     | Participants’ score of Edinburgh Postnatal Depression Scale                                            | \                                                           |
